# Supplementary material for: Epigenetic-scale comparison of human iPSCs generated by retrovirus, Sendai virus or episomal vectors
Source: PubMed Central journal article supplement — Regen Ther. 2018 Sep 1;9:71–8. doi: 10.1016/j.reth.2018.08.002 (PMC6222281; doi:10.1016/j.reth.2018.08.002), 2018-09-01
Supplement: mmc6.pdf [file mmc6.pdf]

## Supplemental Fig. 2

**A**

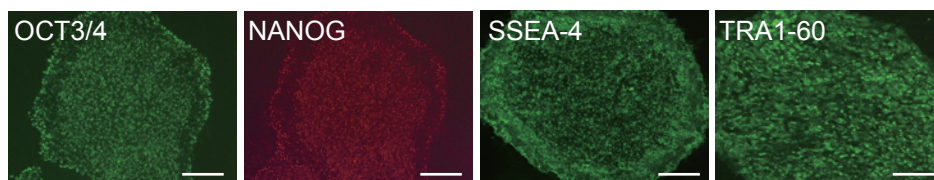

**B**

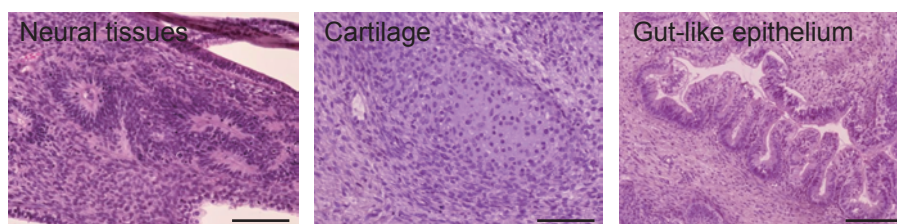

**C**

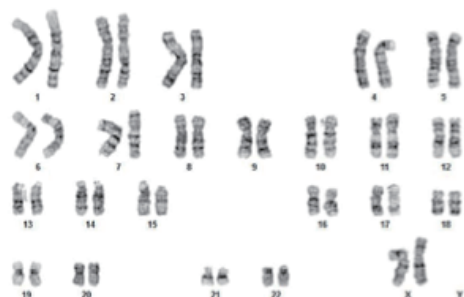

| Cell line ID        | Karyotype | Cell number |
|---------------------|-----------|-------------|
| Episomal-Edom-iPS-1 | 46, XX    | 50          |
| Episomal-Edom-iPS-8 | 46, XX    | 50          |
| Episomal-Edom-iPS-9 | 46, XX    | 49          |
|                     | 47, XX    | 1           |

**D**

| Locus   | Edom 22 (Parent cell) |    | Episomal-Edom-iPS-1 |    | Episomal-Edom-iPS-8 |    | Episomal-Edom-iPS-9 |    |
|---------|-----------------------|----|---------------------|----|---------------------|----|---------------------|----|
| D3S1358 | 15                    | 18 | 15                  | 18 | 15                  | 18 | 15                  | 18 |
| TH01    | 7                     | 9  | 7                   | 9  | 7                   | 9  | 7                   | 9  |
| D21S11  | 30                    | 31 | 30                  | 31 | 30                  | 31 | 30                  | 31 |
| D18S51  | 16                    |    | 16                  |    | 16                  |    | 16                  |    |
| Penta_E | 8                     | 18 | 8                   | 18 | 8                   | 18 | 8                   | 18 |
| D5S818  | 11                    |    | 11                  |    | 11                  |    | 11                  |    |
| D13S317 | 8                     | 12 | 8                   | 12 | 8                   | 12 | 8                   | 12 |
| D7S820  | 9                     | 12 | 9                   | 12 | 9                   | 12 | 9                   | 12 |
| D16S539 | 10                    | 12 | 10                  | 12 | 10                  | 12 | 10                  | 12 |
| CSF1PO  | 12                    |    | 12                  |    | 12                  |    | 12                  |    |
| Penta_D | 9                     | 11 | 9                   | 11 | 9                   | 11 | 9                   | 11 |
| AMEL    | X                     |    | X                   |    | X                   |    | X                   |    |
| vWA     | 14                    | 17 | 14                  | 17 | 14                  | 17 | 14                  | 17 |
| D8S1179 | 13                    | 14 | 13                  | 14 | 13                  | 14 | 13                  | 14 |
| TPOX    | 11                    |    | 11                  |    | 11                  |    | 11                  |    |
| FGA     | 19                    | 24 | 19                  | 24 | 19                  | 24 | 19                  | 24 |
