# Supplementary figures and images for: Epigenetic-scale comparison of human iPSCs generated by retrovirus, Sendai virus or episomal vectors
Source: PubMed Central journal article supplement — Regen Ther. 2018 Sep 1;9:71–8. doi: 10.1016/j.reth.2018.08.002 (PMC6222281; doi:10.1016/j.reth.2018.08.002), 2018-09-01

Supplemental Fig. 3

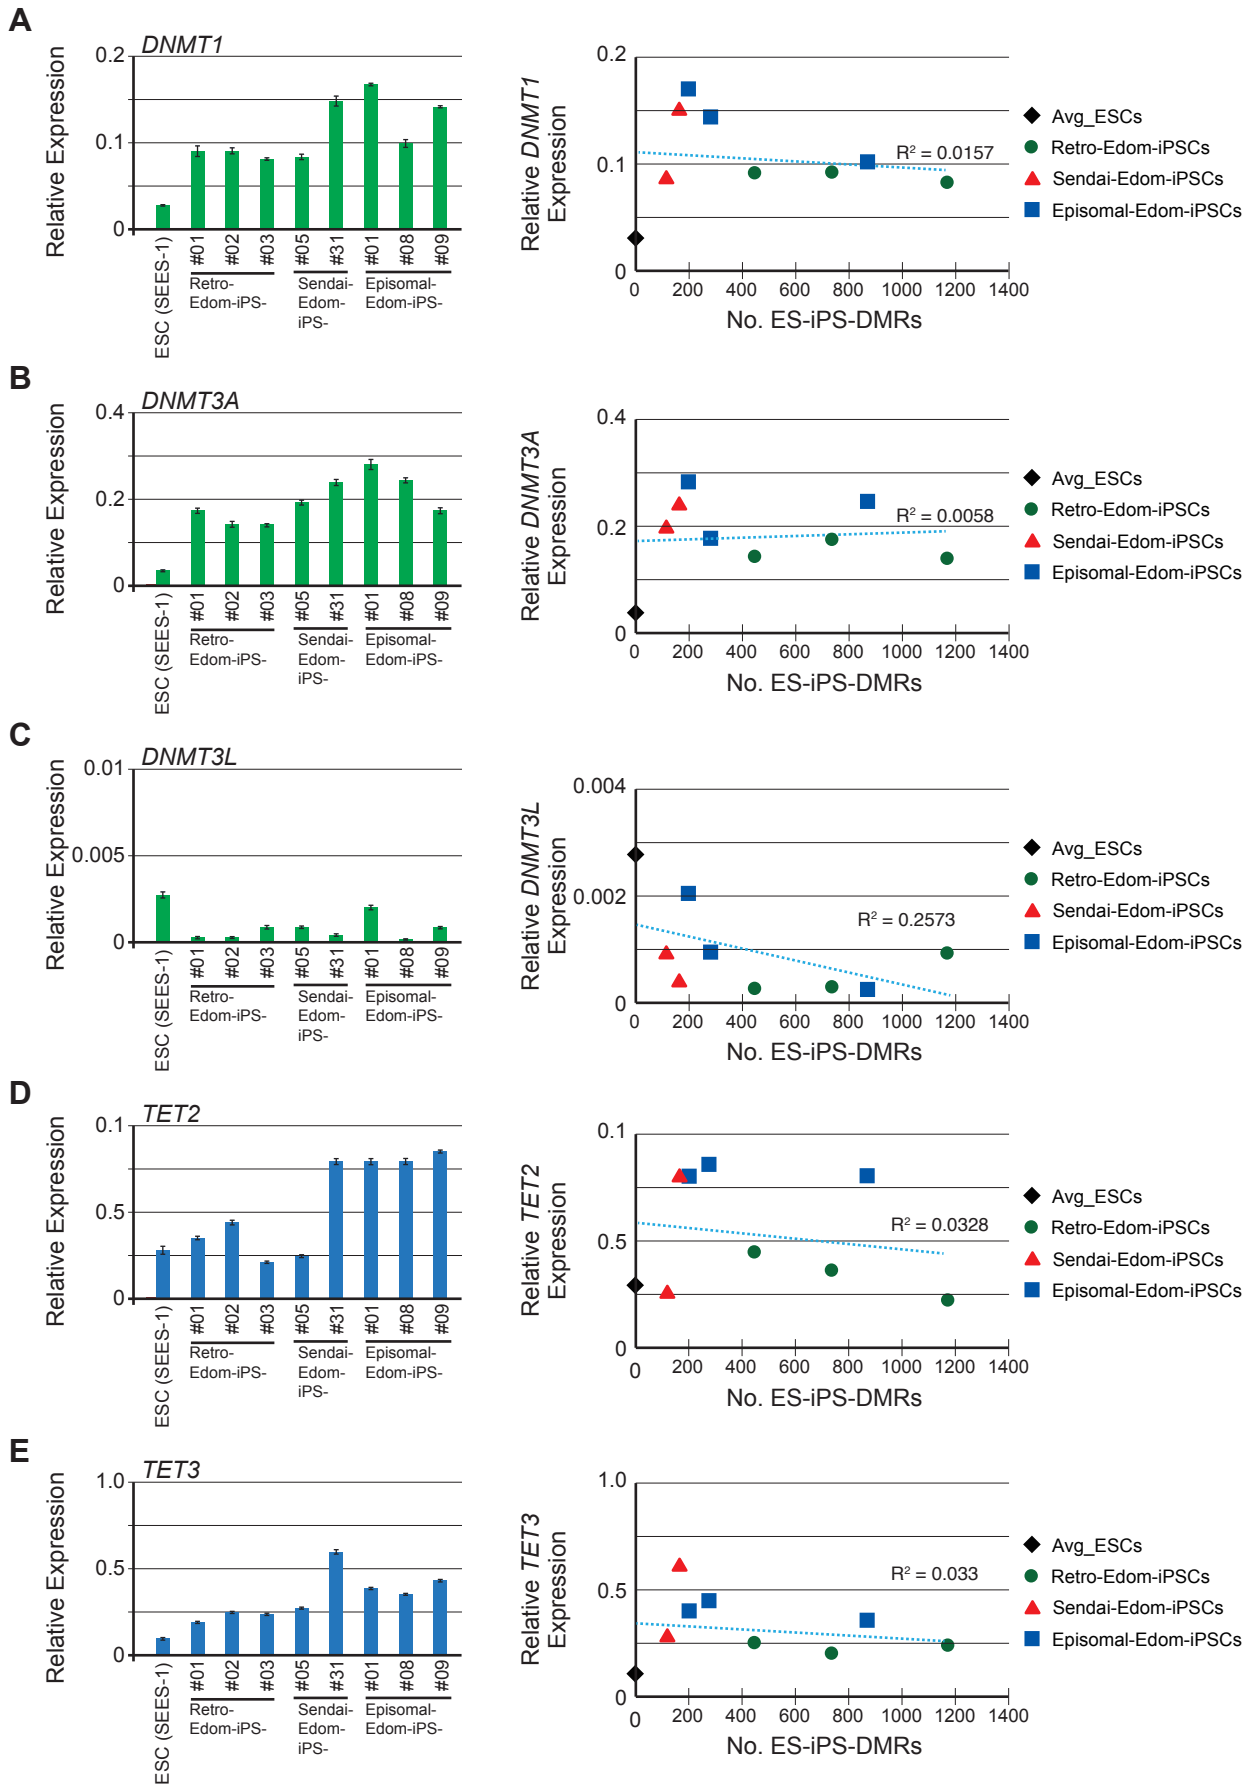

Supplement: mmc7.pdf [file mmc7.pdf]

## Supplemental Fig. 4

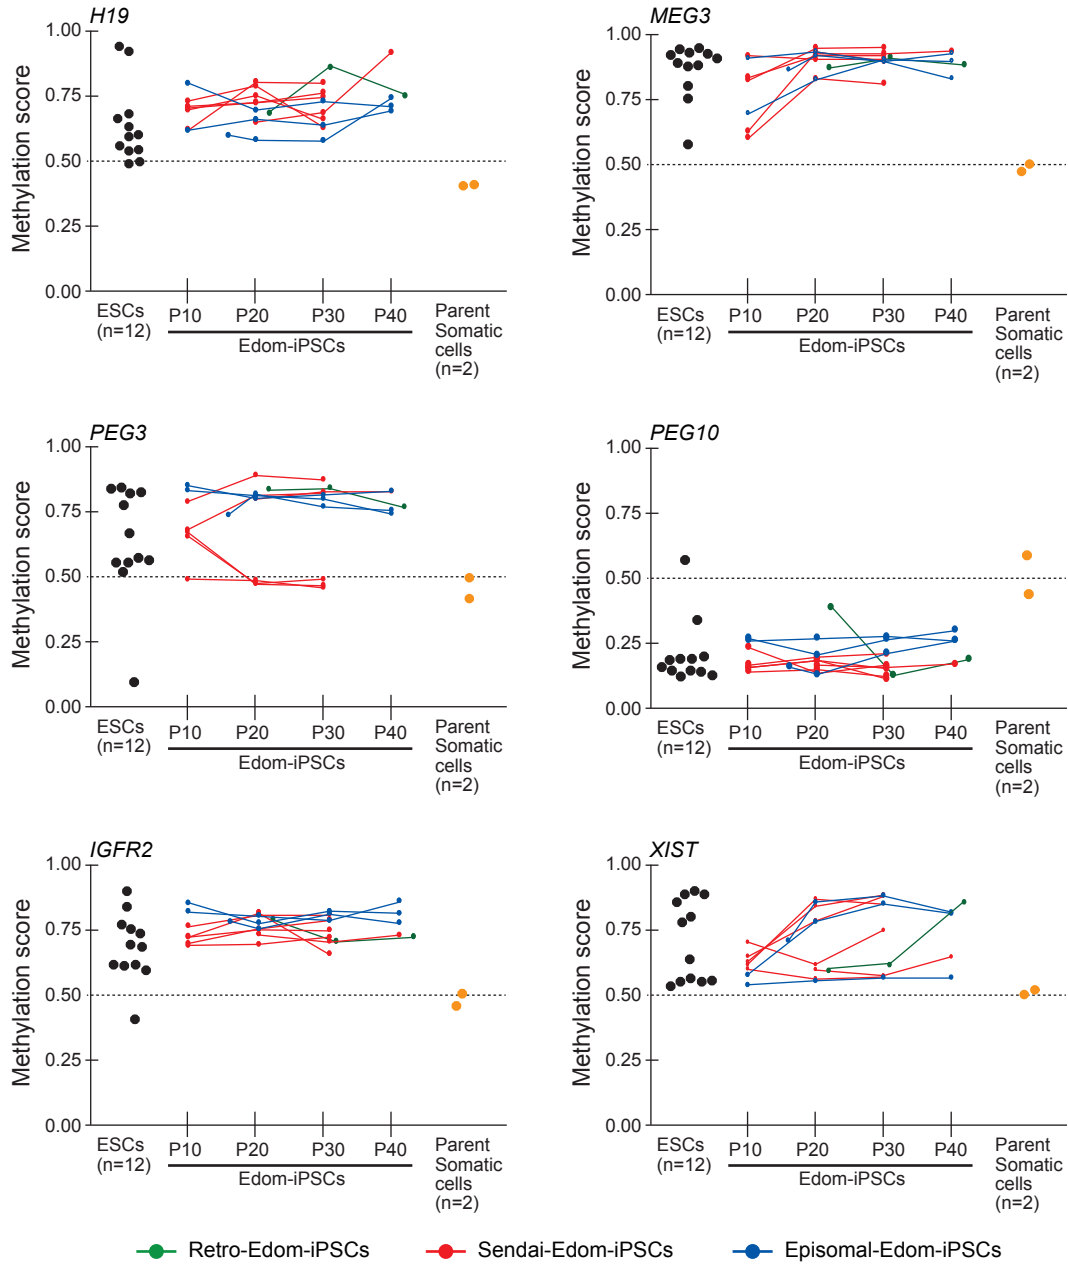

Supplement: mmc8.pdf [file mmc8.pdf]
